# Supplementary material for: Loneliness and the risk of type 2 diabetes
Source: PubMed Central journal article supplement — BMJ Open Diabetes Res Care. 2024 Mar 12;12(2):e003934. doi: 10.1136/bmjdrc-2023-003934 (PMC11146379; doi:10.1136/bmjdrc-2023-003934), 2024-03-12
Supplement: bmjdrc-2023-003934supp001.pdf [file bmjdrc-2023-003934supp001.pdf]

## METHOD

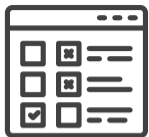

SURVEY

Feeling lonely

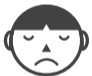

N = 465,290

Follow-up

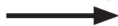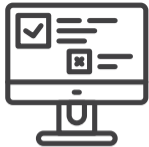

REGISTERS

Type 2 diabetes

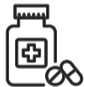

N = 13,771

## RESULTS

Increased **risk** of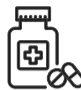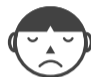

Once in a while

14%

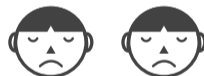

Often

24%
